# Supplementary material
Source: publisher figshare collection journal article supplement (https://acs.figshare.com/ndownloader/files/4113721)
Supplement: Supplementary file 1 [file 4113721]

# Supporting Information

## Large-scale Synthesis and Characterization of Very Long Silver Nanowires via Successive Multistep Growth

*Jin Hwan Lee<sup>1\*</sup>, Phillip Lee<sup>1\*</sup>, Dongjin Lee<sup>2</sup>, Seung Seob Lee<sup>1</sup>, Seung Hwan Ko<sup>1†</sup>*

<sup>1</sup> *Department of Mechanical Engineering, Korea Advanced Institute of Science and Technology (KAIST),  
291 Daehak-ro, Yuseong-gu, Daejeon, 305-701, Korea*

<sup>2</sup> *School of Mechanical Engineering, Konkuk University, 120 Neungdong-ro, Gwangjin-gu, Seoul 143-  
701, Korea*

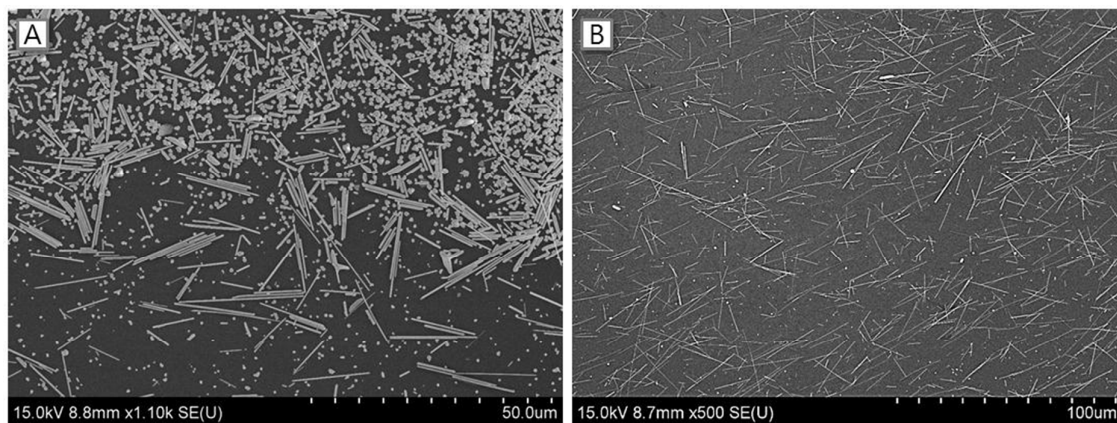

**Figure S1.** The effect of stir bar length used in oil bath and reaction flask: scanning electron microscopy (SEM) images of synthesized silver nanowires at different condition of #1 (A) and #3 (B). The scale bars indicate 100  $\mu\text{m}$ .

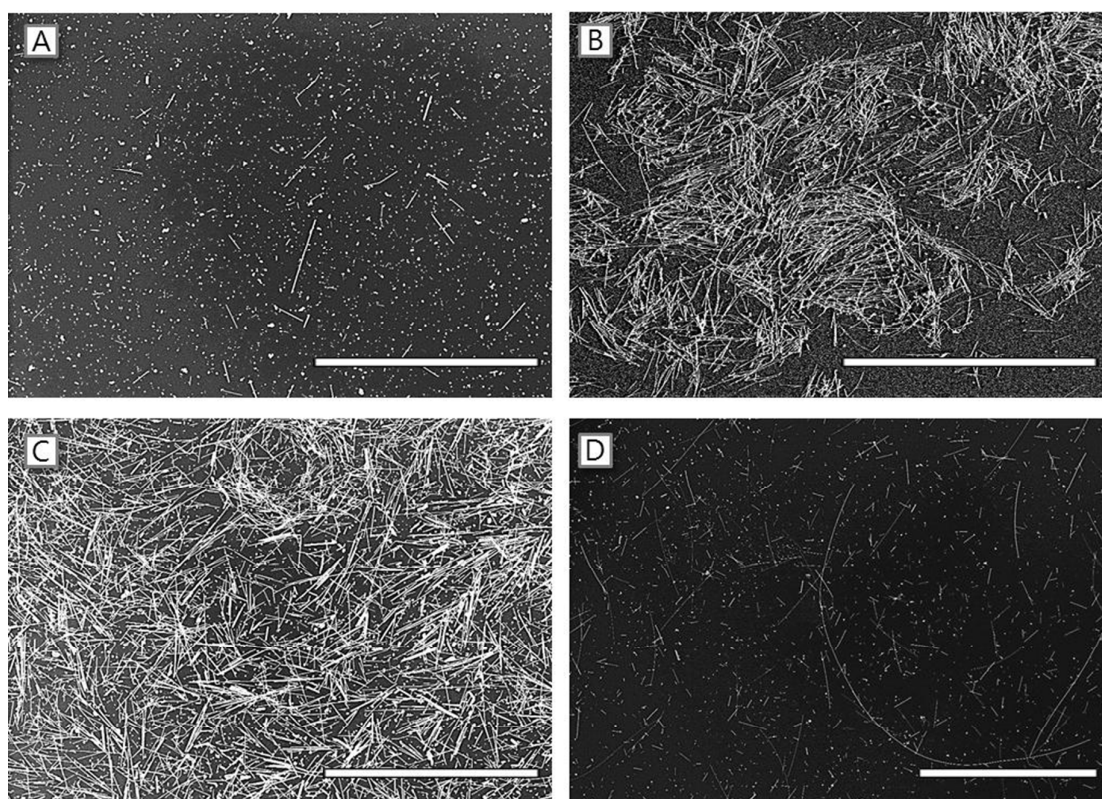

**Figure S2.** The result of synthesis at different stirring rates: SEM images of synthesized silver nanowires at different stirring rates of 600 (A), 400 (B), 300 (C), and 150 rpm (D). The scale bars are 100  $\mu\text{m}$

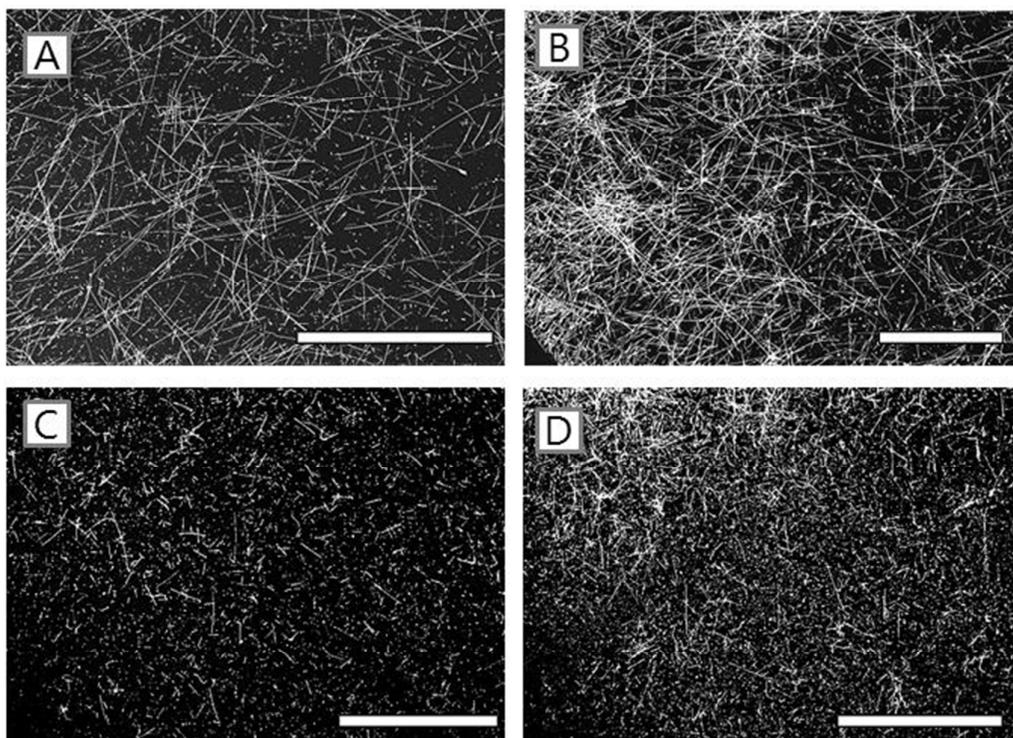

**Figure S3.** The effect of injection speed of  $\text{AgNO}_3$  solution through syringe pump: SEM images of synthesized silver nanowires at injection rates of 0.5 (A), 1 (B), 15 (C), and 30 ml/min (D). The scale bar is 100  $\mu\text{m}$  in A, B, and C, while the one in D is 50 $\mu\text{m}$ .

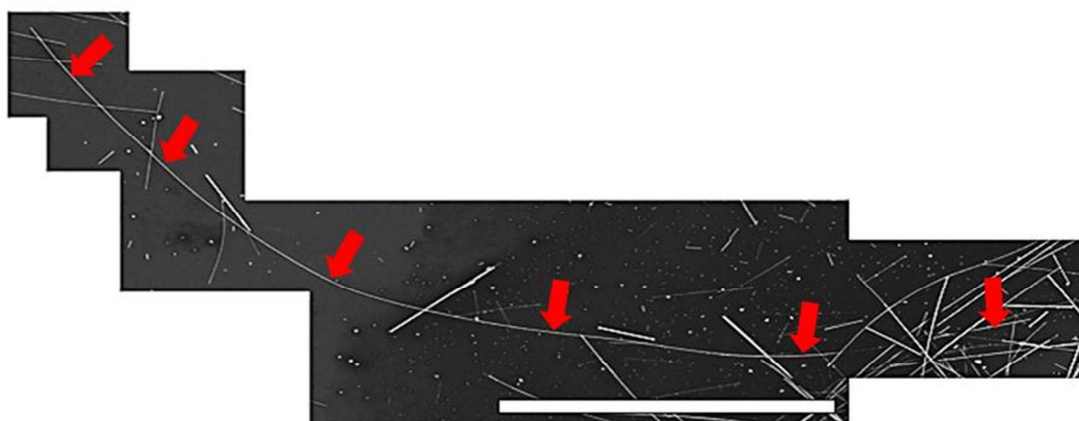

**Figure S4.** The longest AgNW synthesized through the SMG process (over 500  $\mu\text{m}$ ). The scale bar is 200  $\mu\text{m}$ .



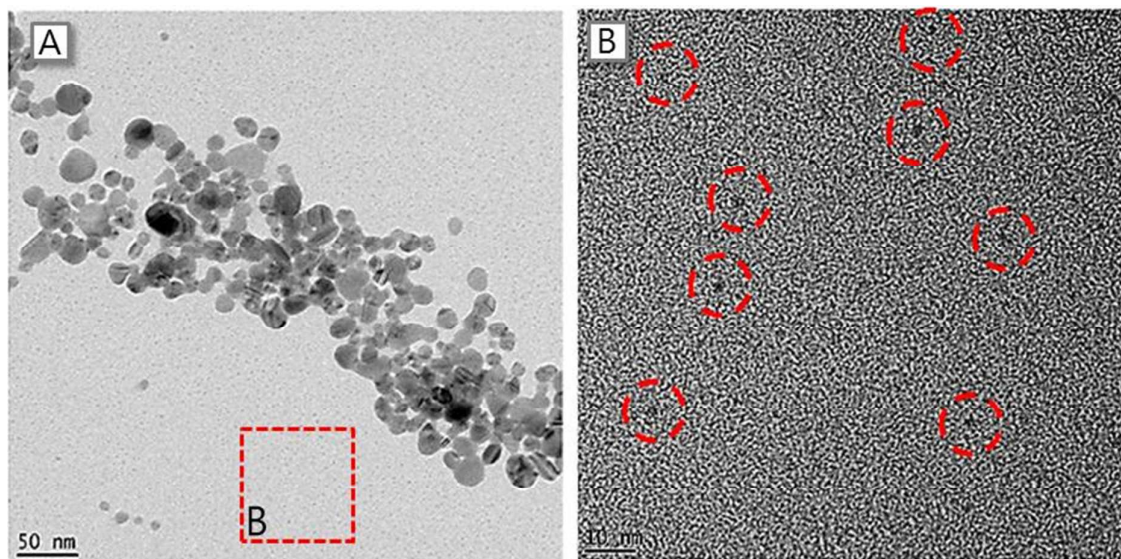

**Figure S5.** TEM images of sonicated  $\text{AgNO}_3$  in EG

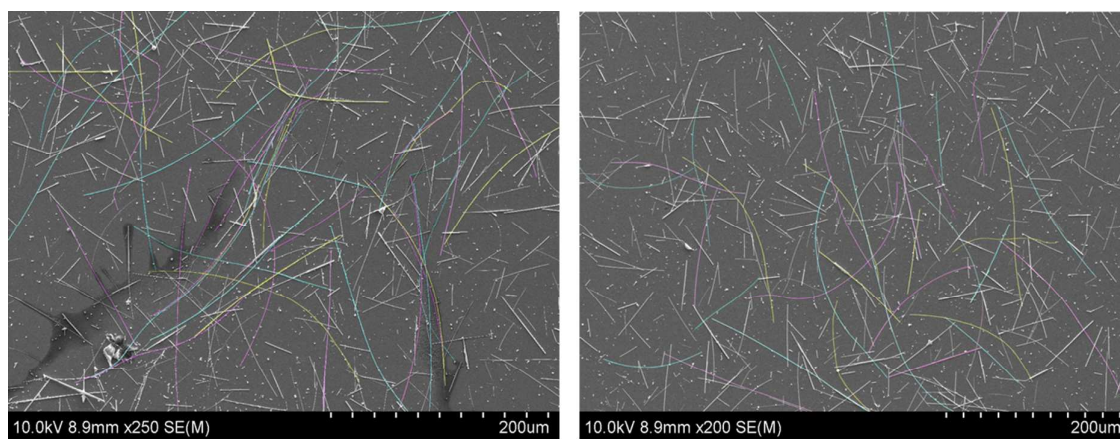

**Figure S6.** SEM images of very long silver nanowires with low magnification. Painted with 3 colors nanowire have almost 200  $\mu\text{m}$  or longer length.

Table S1

| Trial number | Stir bar length (mm) |          | Stirring rate (rpm) | State of AgNO <sub>3</sub> |                          | Max. length of AgNW (μm) |
|--------------|----------------------|----------|---------------------|----------------------------|--------------------------|--------------------------|
|              | In oil bath          | In flask |                     | Sonication (min)           | Injection Speed (ml/min) |                          |
| 1            | 50                   | 25       | 300                 | 3                          | 3                        | 48                       |
| 2            | 38                   | 38       |                     |                            |                          | 53                       |
| 3            | 50                   | 15.8     |                     |                            |                          | 87                       |
| 4            | 50                   | 10       |                     |                            |                          | 168                      |
| 5            | 38                   | 25       |                     |                            |                          | 83                       |
| 6            | 50                   | 15.8     | 400                 | 3                          | 3                        | 58                       |
| 7            |                      |          | 300                 |                            |                          | 83                       |
| 8            |                      |          | 260                 |                            |                          | 105                      |
| 9            |                      |          | 200                 |                            |                          | 33                       |
| 10           |                      |          | 150                 |                            |                          | 281                      |
| 11           | 50                   | 15.8     | 260                 | -                          | 3                        | -                        |
| 12           |                      |          |                     | 2                          |                          |                          |
| 13           |                      |          |                     | 7                          |                          |                          |
| 14           |                      |          |                     | 10                         |                          |                          |
| 15           |                      |          |                     | 30                         |                          |                          |
| 16           |                      |          |                     | 30+ heating                |                          |                          |
| 17           | 50                   | 15.8     | 260                 | 7                          | 0.5                      | 80~90                    |
| 18           |                      |          |                     |                            | 1                        | 70~80                    |
| 19           |                      |          |                     |                            | 3                        | ~50                      |
| 20           |                      |          |                     |                            | 5                        | ~60                      |
| 21           |                      |          |                     |                            | 15                       | ~50                      |
| 22           |                      |          |                     |                            | 30                       | ~40                      |
